# Supplementary material for: Durability Study on Ternary Blended Alumina- Silicate Concrete in Marine Environments
Source: Research Square preprint supplement (doi:10.21203/rs.3.rs-7390662/v1), 2025-09-22
Supplement: Supplementary file 1 [file 245a424cc99b74d434b321a2.docx]

**Compressive Strength of Concrete after 28 days**

| **Mix Id** | **Compressive Strength (N/Mm2)** | | |
| --- | --- | --- | --- |
| **Ambient Curing** | **Normal Water**  **Curing** | **Marine Water**  **Curing** |
| GPC-A | 36.6 | 33.5 | 39.8 |
| GPC-B | 35.1 | 13.6 | 14.2 |
| GPC-C | 35.9 | 14.8 | 15.6 |
| GPC-D | 31.4 | 11.5 | 13.5 |

**Compressive Strength of Concrete after 56 days**

| **Mix Id** | **Compressive Strength (N/Mm2)** | |
| --- | --- | --- |
| **Normal Water Curing** | **Marine Water Curing** |
| GPC-A | 33.5 | 39.8 |
| GPC-B | 13.6 | 14.2 |
| GPC-C | 14.8 | 15.6 |
| GPC-D | 11.5 | 13.5 |

**Split tensile test**

| **Mix Id** | **Split Tensile Strength (Mpa)** |
| --- | --- |
| GPC-A | 4.7 |
| GPC-B | 3.6 |
| GPC-C | 4.2 |
| GPC-D | 2.9 |

**weight loss % of GPC-A**

| SAMPLE | Normal curing (%) | Marine curing (%) |
| --- | --- | --- |
| 1 | 3.75% | 1.66% |
| 2 | 5.17% | 2.89% |
| 3 | 4.06% | 2.10% |
